# Supplementary material
Source: Springer Nature journal article supplement (https://www.springermedizin.de/resource/supplementary/12891_2008_676_MOESM3_ESM.pdf/9506544)
Supplement: MOESM3 [file 9506544]

Citations identified by all searches (n=1351)

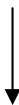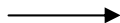

Rejected on title, abstract and keywords (n=1299)

Citations only relevant to knee review removed (n=25)

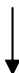

Potentially relevant RCT abstracts identified and screened for retrieval (n=27)

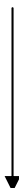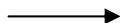

13 abstracts excluded (see Table 3)  
n= 5 not a rct  
n= 4 inpatient intervention  
n=2 duplicate trial reports  
n=1 osteopathic manipulation intervention  
n= 1 pre op and post op intervention

Full papers obtained and screened for retrieval (n=14)

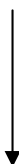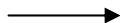

6 papers excluded  
n= 1 preoperative intervention  
n= 3 inpatient intervention  
n=1 not a trial  
n = 1 patients with injurious falls

RCTs evaluated in detail (n=8)

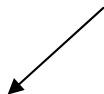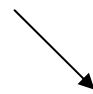

RCTs suitable for inclusion/part  
inclusion in meta-analysis (n=2)

RCTs excluded from meta-analysis (n=6)
